# Supplementary material for: The Expression of the Immunoproteasome Subunit PSMB9 Is Related to Distinct Molecular Subtypes of Uterine Leiomyosarcoma
Source: MDPI journal article supplement (doi:10.3390/cancers14205007), 2022-10-13
Supplement: s1 [file s1]

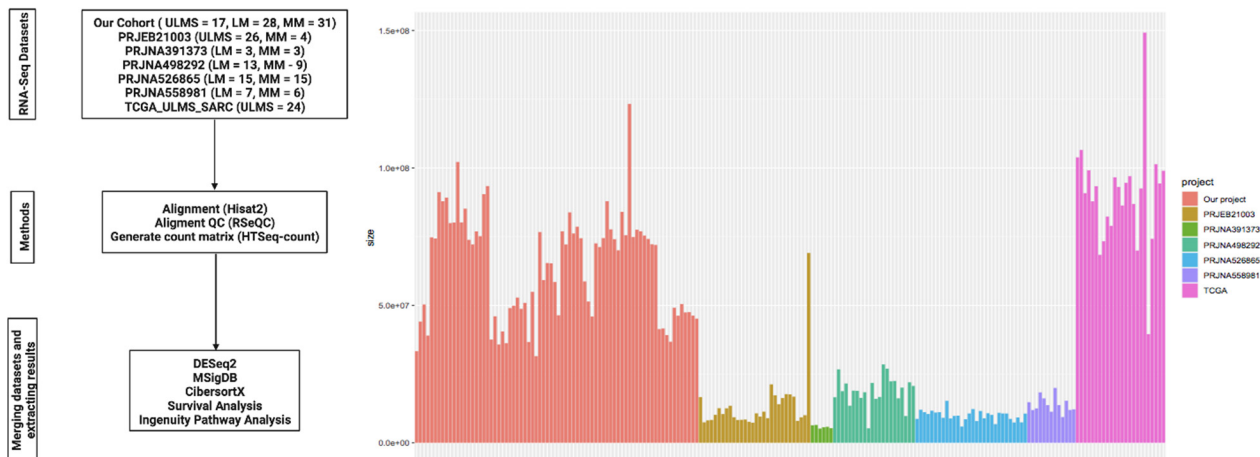

Supplementary Figure S1. (A) Patients samples flowchart; (B) barplot showing different library sizes of each BioProject. TPM normalization can be used in order to integrate the data.

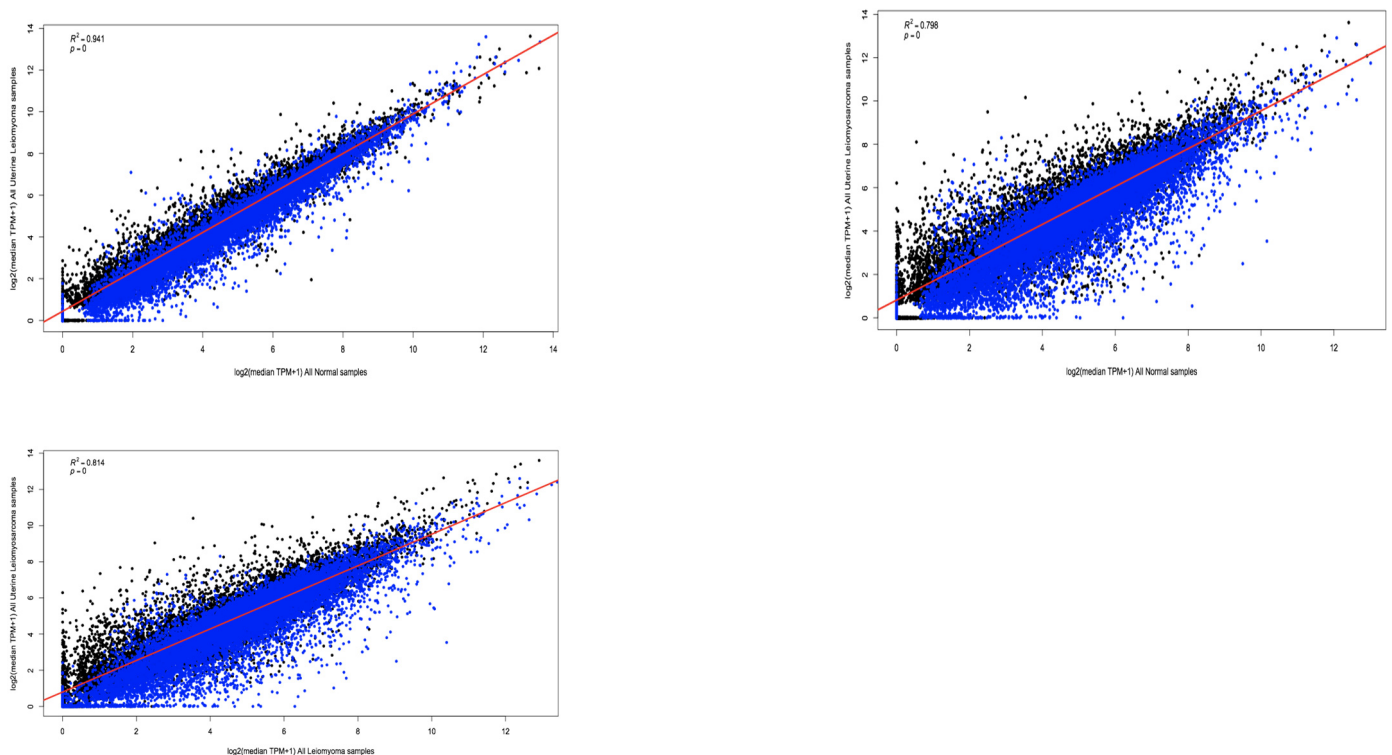

Supplementary Figure S2. (A) Concordance of gene expression between normal adjacent myometrium (MM) and leiomyoma (LM) samples after data integration. Each point is a gene, with black points representing protein coding from LM samples and blue points representing protein coding from MM samples. The red line represents the linear regression in the form of  $Y \sim X$ ; (B) concordance of gene expression between MM and uterine leiomyosarcoma (uLMS) samples after data integration. Each point is a gene, with black points representing protein coding from uLMS samples and blue points representing protein coding from MM samples. The red line represents the linear regression in the form of  $Y \sim X$ ; (C) concordance of gene expression between LM and uLMS samples after data integration. Each point is a gene, with black points representing protein coding from uterine leiomyosarcoma samples and blue points representing protein coding from leiomyoma samples. The red line represents the linear regression in the form of  $Y \sim X$ .

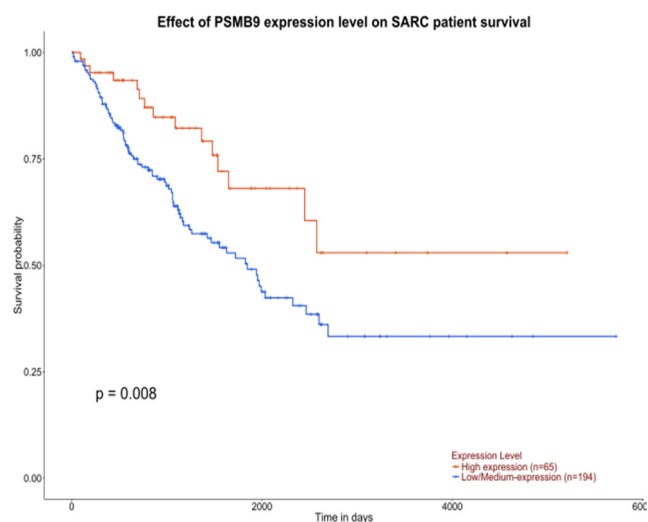

Supplementary Figure S3. Kaplan–Meier curves from all TCGA-SARC samples. High PSMB9 expression group consists of samples with TPM values above upper quartile. Low/medium PSMB9 expression group consists of samples with TPM values below upper quartile.

Supplementary Table S1. The number of samples per group and per project.

| Project Name   | #Total Samples | #uLMS Samples | #LM Samples | #MM Samples | Project Name   |
|----------------|----------------|---------------|-------------|-------------|----------------|
| TCGA_uLMS_SARC | 24             | 24            | 0           | 0           | TCGA_uLMS_SARC |
| PRJEB21003     | 30             | 26            | 0           | 4           | PRJEB21004     |
| PRJNA526865    | 30             | 0             | 15          | 15          | PRJNA526865    |
| PRJNA498292    | 22             | 0             | 13          | 9           | PRJNA498292    |
| PRJNA558981    | 13             | 0             | 7           | 6           | PRJNA558981    |
| PRJNA391373    | 6              | 0             | 3           | 3           | PRJNA391373    |
| Our project    | 76             | 17            | 28          | 31          | Our project    |
| TOTAL          | 201            | 67            | 66          | 68          | TOTAL          |

Supplementary Table S2. Analysis of correlation between PSMB9 expression value and CD8+ in the low/high groups. In red, the discordant samples are highlighted.

| Sample_name        | CD8_value   | PSMB9_value | PSMB9_LEVEL_GROUP | CD8_PSMB9_ratio | CD8_PSMB9_LEVEL_GROUP |
|--------------------|-------------|-------------|-------------------|-----------------|-----------------------|
| LMS_P17312_201_S20 | 0           | 5.766692075 | LOW               | 0               | LOW                   |
| LMS_P17312_215_S32 | 0           | 0.443936328 | LOW               | 0               | LOW                   |
| LMS_P17312_237_S52 | 0           | 4.872600975 | LOW               | 0               | LOW                   |
| TCGA.JV.A75J       | 0           | 1.311145467 | LOW               | 0               | LOW                   |
| TCGA.KD.A5QU       | 0.121089905 | 6.587302162 | LOW               | 0.018382321     | HIGH                  |
| TCGA.N1.A6IA       | 0           | 5.022424434 | LOW               | 0               | LOW                   |
| LMS_P17312_203_S22 | 0           | 30.15376278 | HIGH              | 0               | LOW                   |
| LMS_R106           | 0.383871163 | 79.08063415 | HIGH              | 0.004854174     | HIGH                  |
| LMS_R51            | 0.152514955 | 32.03993129 | HIGH              | 0.004760152     | HIGH                  |
| LMS_R59            | 0.204694647 | 36.00971655 | HIGH              | 0.005684428     | HIGH                  |
| TCGA.3B.A9HV       | 0           | 26.18430585 | HIGH              | 0               | LOW                   |
| TCGA.IS.A3K6       | 0.35202806  | 54.86086192 | HIGH              | 0.006416743     | HIGH                  |
| TCGA.JV.A5VE       | 0.363458438 | 72.89517077 | HIGH              | 0.004986043     | HIGH                  |
